- 1 **The circulating proteome and brain health: Mendelian randomisation and cross-sectional analyses**
- 2 Rosie M. Walker PhD<sup>a,b,c,\*</sup>
- 3 Michael Chong PhD<sup>a,d\*</sup>
- 4 Nicolas Perrot PhD<sup>a</sup>
- 5 Marie Pigeyre MD<sup>a,e</sup>
- 6 Danni A. Gadd PhD<sup>f</sup>
- 7 Aleks Stolicyn PhD<sup>c</sup>
- 8 Liu Shi PhD<sup>g,h</sup>
- 9 Archie Campbell MA<sup>i</sup>
- 10 Xueyi Shen PhD<sup>c</sup>
- 11 Heather C. Whalley PhD<sup>c,i</sup>
- 12 Alejo Nevado-Holgado PhD<sup>g</sup>
- 13 Andrew M. McIntosh MD<sup>c</sup>
- 14 Stefan Heitmeier<sup>j</sup>
- 15 Sumathy Rangarajan MSc<sup>a</sup>
- 16 Martin O'Donnell<sup>a,k</sup>
- 17 Eric E. Smith MD<sup>a,l,m,n</sup>
- 18 Salim Yusuf DPhil<sup>a,e,†</sup>
- 19 William N. Whiteley FRCP<sup>a,c,o,†</sup>
- 20 Guillaume Paré MD<sup>a,d,p,†</sup>

21 <sup>a</sup>Population Health Research Institute, Hamilton Health Sciences and McMaster University, Hamilton,  
22 ON, Canada

23 <sup>b</sup>School of Psychology, University of Exeter, Perry Road, Exeter, UK

24 <sup>c</sup>Centre for Clinical Brain Sciences, The University of Edinburgh, Edinburgh, UK

25 <sup>d</sup>Department of Pathology and Molecular Medicine, Faculty of Health Sciences, McMaster University,  
26 Hamilton, ON, Canada

27 <sup>e</sup>Department of Medicine, Michael G DeGroote School of Medicine, Faculty of Health Sciences,  
28 McMaster University, Hamilton, ON, Canada

29 <sup>f</sup>Centre for Genomic and Experimental Medicine, Institute of Genetics and Cancer, University of  
30 Edinburgh, Edinburgh, UK

31 <sup>g</sup>Department of Psychiatry, University of Oxford, Oxford, UK

32 <sup>h</sup>Nxera Pharma UK Limited, Cambridge, UK

33 <sup>i</sup>Generation Scotland, Centre for Genomic and Experimental Medicine, Institute of Genetics and  
34 Cancer, University of Edinburgh, Edinburgh, EH4 2XU, UK

35 <sup>j</sup>Bayer AG, Pharmaceuticals, R&D, 42113, Wuppertal, Germany

36 <sup>k</sup>Health Research Board Clinical Research Facility, University of Galway, Galway, Ireland

37 <sup>l</sup>Department of Clinical Neurosciences and Hotchkiss Brain Institute, Cumming School of Medicine,  
38 Calgary, Alberta, Canada

39 <sup>m</sup>University of Calgary, Calgary, Alberta, Canada

40 <sup>n</sup>Department of Clinical Neurosciences, University of Calgary, Calgary, Alberta, Canada

41 <sup>o</sup>MRC Centre for Population Health, University of Oxford, Oxford, UK

42 <sup>P</sup>Thrombosis and Atherosclerosis Research Institute, Hamilton Health Sciences and McMaster

43 University, Hamilton, ON, Canada

44 \*Joint first authors

45 <sup>†</sup>Joint final authors

46 Corresponding authors: [pareg@mcmaster.ca](mailto:pareg@mcmaster.ca) and [r.walker4@exeter.ac.uk](mailto:r.walker4@exeter.ac.uk)

47

48 **Abstract**

49 Decline in cognitive function is the most feared aspect of ageing. Poorer midlife cognitive function is  
50 associated with increased dementia and stroke risk. The mechanisms underlying variation in  
51 cognitive function are uncertain. Here, we assessed associations between 1160 proteins' plasma  
52 levels and two measures of cognitive function, the digit symbol substitution test (DSST) and the  
53 Montreal Cognitive Assessment in 1198 PURE-MIND participants. We identified five DSST  
54 performance-associated proteins (NCAN, BCAN, CA14, MOG, CDCP1), with NCAN and CDCP1  
55 showing replicated association in an independent cohort, GS (N=1053). MRI-assessed structural  
56 brain phenotypes partially mediated (8-19%) associations between NCAN, BCAN, and MOG, and  
57 DSST performance. Mendelian randomisation analyses suggested higher CA14 levels might cause  
58 larger hippocampal volume and increased stroke risk, whilst higher CDCP1 levels might increase  
59 intracranial aneurysm risk. Our findings highlight candidates for further study and the potential for  
60 drug repurposing to reduce risk of stroke and cognitive decline.

61 **Acronyms:** Average causal mediation effect (ACME); brevicin (BCAN); carbonic anhydrase 14 (CA14);  
62 cluster of differentiation 6 (CD6); CUB-domain containing protein 1 (CDCP1); confidence interval (CI);  
63 cerebral microbleed (CMB); cerebrospinal fluid (CSF); digit symbol substitution test (DSST);  
64 extracellular matrix (ECM); false discovery rate (FDR); Generation Scotland imaging subsample (GS);  
65 Generation Scotland: Scottish Family Health Study (GS:SFHS); instrumental variable (IV); inverse  
66 variance weighted (IVW); myelin oligodendrocyte glycoprotein (MOG); Montreal Cognitive  
67 Assessment (MoCA); Mendelian randomisation (MR); magnetic resonance imaging (MRI); neurocan  
68 (NCAN); perineuronal net (PNN); odds ratio (OR); posterior probability (PP); protein quantitative trait  
69 loci (pQTL); pairwise conditional analysis and co-localisation analyses (PWCoCo); Prospective Urban  
70 and Rural Epidemiology (PURE); robust adjusted profile score (RAPS); silent brain infarct (SBI);  
71 standard deviation (SD); small vessel disease (SVD); white matter hyperintensity (WMH)

72 **Key words:** cognition, dementia, Alzheimer's disease, stroke, proteins, brain structure, MRI,

73 Mendelian randomisation

74 **1. Introduction**

75 Decline in cognitive ability and dementia are the most feared aspects of ageing <sup>[1]</sup>, providing a strong  
76 rationale for investigating the mechanisms underlying cognitive function. Poorer cognitive function  
77 is associated with a greater risk of Alzheimer’s dementia and stroke <sup>[2, 3]</sup>. This may be due to reduced  
78 “cognitive reserve”, which postulates that lower premonitory cognitive function leads to worse  
79 cognitive impairment for a given degree of neuropathology <sup>[4]</sup>. Better understanding of these  
80 mechanisms could inform strategies for the prevention and treatment of dementia and stroke.

81 Recent studies have highlighted the potential for investigating cognition and structural brain  
82 phenotypes through the study of plasma proteins <sup>[5-9]</sup>. These studies identified associations between  
83 cognitive function and proteins involved in biological functions previously implicated in dementia,  
84 including synaptic function, inflammation, immune function, and blood-brain barrier integrity <sup>[5-7, 9]</sup>.  
85 At the time of carrying out this study, previous studies were limited by a focus on a restricted  
86 number of proteins and/or purely observational analyses.

87 Here, we investigated associations between 1160 plasma proteins and cognitive function in the  
88 Prospective Urban and Rural Epidemiology (PURE)-MIND cohort <sup>[10]</sup>, and we sought replication in the  
89 independent imaging subsample of the Generation Scotland cohort (henceforth, referred to as  
90 “GS”). The proteins assessed represent a wide range of biological processes, permitting a  
91 hypothesis-free approach to investigating cognitive function. Subsets of these proteins have been  
92 assessed in previous studies, allowing assessment of cross-study replication.

93 Using a simple measure of processing speed, the digit symbol substitution task (DSST), and a  
94 cognitive screening tool, the Montreal Cognitive Assessment (MoCA), we carried out a screen for  
95 cognition-associated proteins, and then employed mediation analyses to assess the proportion of  
96 the protein expression-cognition relationship that could be explained by structural brain  
97 phenotypes, including measures of brain volume and white matter hyperintensity (WMH) volume.  
98 WMH is an MRI marker of white matter damage, and is one of the manifestations of age-related

99 cerebral small vessel disease. Two sample Mendelian randomisation (MR) analyses were performed  
100 to assess potentially causal effects of genetically predicted protein levels on genetically predicted  
101 cognitive function, brain structure, stroke subtypes, and Alzheimer’s disease (see **Figure 1** for an  
102 overview of the study design).

103

## 104 2. Results

### 105 Cohort characteristics

106 Key demographic, cognitive, brain MRI, and health variables for the participants in PURE-MIND  
107 (N=1198) and GS (N=1053) are summarised in **Table 1**. Participants in PURE-MIND were significantly  
108 younger than participants in GS (PURE-MIND: mean = 54.5 years (SD = 8.05 years); GS: mean = 59.9  
109 years (SD = 9.59 years);  $p < 2.2 \times 10^{-16}$ ), and a small, but significant, between-cohort difference in  
110 DSST score was observed (PURE-MIND: mean = 69.5 (SD = 15.3); GS: mean = 68.1 (SD = 15.2);  $p =$   
111 0.0298). Differences in the levels/types of education received by the two cohorts were observed ( $p =$   
112  $5 \times 10^{-4}$ ). The two cohorts also differed significantly on several brain volume measurements: PURE-  
113 MIND participants have a smaller total brain volume (PURE-MIND: mean = 1058 cm<sup>3</sup> (SD = 110 cm<sup>3</sup>);  
114 GS: mean = 1069 cm<sup>3</sup> (SD = 109 cm<sup>3</sup>);  $p = 0.0212$ ), cerebral white matter volume (PURE-MIND: mean  
115 = 447 cm<sup>3</sup> (SD = 60.5 cm<sup>3</sup>); GS: mean = 455 cm<sup>3</sup> (SD = 56.9 cm<sup>3</sup>);  $p = 1.87 \times 10^{-3}$ ), and hippocampal  
116 volume (PURE-MIND: mean = 3.92 cm<sup>3</sup> (SD = 0.433 cm<sup>3</sup>); GS: mean = 4.18 cm<sup>3</sup> (SD = 0.437 cm<sup>3</sup>);  $p <$   
117  $2.2 \times 10^{-16}$ ) than GS participants, whilst GS participants have a smaller intracranial volume (ICV) than  
118 PURE-MIND participants (PURE-MIND: mean = 1491 cm<sup>3</sup> (SD = 159 cm<sup>3</sup>); GS: mean = 1400 cm<sup>3</sup> (SD =  
119 225 cm<sup>3</sup>);  $p < 2.2 \times 10^{-16}$ ). The two cohorts also differed significantly on other health-related  
120 variables that were not directly assessed in this study (**Table 1**).

121 Scores on the DSST were normally distributed in both PURE-MIND and GS (**Supplementary Figure 1**),  
122 but scores on the MoCA showed a leftward skew in PURE-MIND (**Supplementary Figure 1**).

### 123 Identification of protein biomarkers of cognitive function and enrichment analyses

124 Five proteins were associated with DSST performance in PURE-MIND (**Figure 2**; **Figure 3**;  
125 **Supplementary Table 1**; **Supplementary Figure 2**). Higher plasma levels of neurocan (NCAN;  $\beta = 2.03$   
126 (indicating a 2.03 higher DSST score per a standard deviation higher NCAN level),  $p = 9.11 \times 10^{-8}$ ),  
127 brevican (BCAN;  $\beta = 1.91$ ,  $p = 5.56 \times 10^{-7}$ ), carbonic anhydrase 14 (CA14;  $\beta = 1.90$ ,  $p = 5.90 \times 10^{-7}$ ),



128 and myelin-oligodendrocyte glycoprotein (MOG;  $\beta = 1.82$ ,  $p = 2.29 \times 10^{-6}$ ), and lower levels of CUB  
129 domain-containing protein 1 (CDCP1;  $\beta = -1.57$ ,  $p = 3.97 \times 10^{-5}$ ) were associated with significantly  
130 better DSST performance. Adjustment for educational attainment modestly attenuated the effect  
131 estimate for all five proteins (**Supplementary Table 1**). Levels of NCAN, BCAN and MOG were  
132 positively correlated ( $0.251 \leq r \leq 0.615$ ; all  $p < 2.20 \times 10^{-16}$ ), whilst CDCP1 and CA14 expression levels  
133 were negatively correlated ( $r = -1.01$ ,  $p = 4.82 \times 10^{-4}$ ; **Supplementary Table 2**). Three proteins (NCAN,  
134 BCAN and CDCP1) proteins were also measured in GS, of which two replicated their association with  
135 DSST performance: NCAN ( $\beta = 1.40$ ,  $p = 1.07 \times 10^{-3}$ ) and CDCP1 ( $\beta = -1.99$ ,  $p = 9.21 \times 10^{-6}$ ; **Figure 3**).  
136 MoCA performance was not associated with the level of any protein (all  $p \geq 2.34 \times 10^{-4}$ ;  
137 **Supplementary Table 3; Supplementary Figure 3**). When considering the 129 proteins that were  
138 nominally significantly associated ( $p < 0.05$ ) with DSST score in PURE-MIND and measured in GS  
139 (**Supplementary Table 4**), their effect estimates showed a strong, statistically significant between-  
140 cohort correlation ( $r = 0.625$ ,  $p = 2.34 \times 10^{-15}$ ).

141 Proteins nominally associated ( $p < 0.05$ ) with DSST performance (N = 184) were enriched for brain-  
142 expressed proteins, most significantly for proteins with hippocampal expression (FDR-corrected  $p =$   
143  $0.0154$ ; **Supplementary Table 5**). Better DSST performance was nominally associated with lower  
144 levels of 90 proteins. These proteins mapped to the following immune pathways “interleukin-10  
145 signalling”, “glomerulonephritis”, “regulation of granulocyte chemotaxis”, “positive regulation of  
146 leukocyte chemotaxis”, “positive regulation of leukocyte migration”, and “inflammation” (FDR-  
147 corrected  $p \leq 0.0337$ ; **Supplementary Table 6**).

#### 148 **Structural brain phenotypes as mediators of protein biomarker-DSST performance associations**

149 In PURE-MIND, better DSST performance was associated with greater cerebral white matter volume  
150 ( $\beta = 0.0615$ ,  $p = 4.34 \times 10^{-7}$ ), greater total brain volume ( $\beta = 0.0349$ ,  $p = 9.64 \times 10^{-6}$ ), greater  
151 hippocampal volume ( $\beta = 2.97$ ,  $p = 4.79 \times 10^{-3}$ ), and lower log-transformed WMH volume ( $\beta = -3.20$ ,  
152  $p = 1.18 \times 10^{-6}$ ). These associations replicated in GS (**Supplementary Table 7**).

153 Assessment of the relationships between protein levels and DSST-associated structural brain  
154 phenotypes in PURE-MIND revealed systematic differences between those proteins for which higher  
155 levels were associated with better DSST performance (NCAN, BCAN, CA14, and MOG), and CDCP1,  
156 which was negatively associated with DSST performance (**Figure 4**). Whilst NCAN, BCAN, CA14, and  
157 MOG showed a positive direction of association with total brain, cerebral white matter, and  
158 hippocampal volume measurements and a negative association with WMH volume, the converse  
159 was true for CDCP1. The associations between NCAN levels and total brain, cerebral white matter,  
160 and hippocampal volumes reached statistical significance ( $p \leq 2.56 \times 10^{-5}$ ) and were replicated in GS  
161 ( $p \leq 6.70 \times 10^{-3}$ ). BCAN levels were significantly associated with all four brain volumes ( $p \leq 4.36 \times 10^{-4}$ ),  
162 with the associations with total brain and cerebral white matter volumes replicating in GS ( $p \leq 3.44 \times 10^{-3}$ ).  
163 The associations between MOG levels and total brain and cerebral white matter  
164 volumes attained statistical significance ( $p \leq 2.63 \times 10^{-9}$ ), but could not be assessed in GS. We did not  
165 identify any significant associations with CA14 or CDCP1 levels after multiple testing correction.

166 In PURE-MIND, cerebral white matter volume explained a significant proportion of variance in the  
167 relationship between MOG (19.2%), BCAN (14.9%), and NCAN (12.7%) levels and DSST performance  
168 (all  $p < 2 \times 10^{-16}$ ) (**Supplementary Table 8**). After controlling for cerebral white matter volume, the  
169 average effect estimates (based on 1000 bootstrap resamples) for these proteins were reduced from  
170 1.81 to 1.47 (MOG), 1.91 to 1.62 (BCAN), and 2.03 to 1.77 (NCAN). Log-transformed WMH volume  
171 was a significant partial mediator of the association between BCAN levels and DSST performance ( $p = 0.002$ ).  
172 Controlling for log-transformed WMH resulted in a reduction in the effect estimate from  
173 1.91 to 1.75 (8% mediation).

#### 174 **Identification of potentially causal relationships between protein levels and cognitive function,** 175 **structural brain phenotypes, and disease outcomes**

176 Inverse variance weighted (IVW) MR analyses were performed to assess the effects of genetically  
177 predicted CA14, CDCP1, and MOG levels on cognitive function, structural brain phenotypes, and

178 Alzheimer's disease, and stroke. Protein quantitative trait loci (pQTLs) located in *cis* to the genes  
179 encoding the proteins-of-interest acted as instrumental variables (IVs) for plasma protein levels  
180 (**Supplementary Table 9**). An insufficient number of pQTLs precluded the assessment of BCAN  
181 and NCAN with any of the outcomes-of-interest. For MOG, limited overlap between the pQTLs and  
182 SNPs included in the outcome GWASs meant only a subset of the outcomes-of-interest could be  
183 assessed.

184 A one standard deviation higher level of genetically predicted plasma CA14 was associated with a  
185 larger hippocampal volume ( $\beta = 0.0971$  [95% CI: 0.0300 to 0.164],  $p = 4.58 \times 10^{-3}$ ), and a greater risk  
186 of all stroke (odds ratio (OR) = 1.08 [95% CI: 1.02 to 1.14],  $p = 6.97 \times 10^{-3}$ ; **Supplementary Table 10**).  
187 A one standard deviation higher level of genetically predicted plasma CDCP1 was associated with an  
188 increased risk of intracranial aneurysm (OR = 1.22 [95% CI: 1.02 to 1.47],  $p = 0.0280$ ). These  
189 associations were corroborated by similar effect estimates from weighted median and MR-RAPS  
190 analyses. No evidence of directional or horizontal pleiotropy were observed, and the correct causal  
191 direction was assessed. No significant associations were observed between the genetically predicted  
192 levels of CA14 or CDCP1 and risk of Alzheimer's disease ( $p \geq 0.125$ ) (NB. A lack of significant pQTLs  
193 precluded the assessment of BCAN, MOG, or NCAN).

194 Sensitivity analyses were performed in which instrumental variables (IVs) were selected using a  
195 stricter threshold for independence. For genetically predicted CA14, these analyses supported the  
196 association with hippocampal volume ( $\beta = 0.144$  [95% CI: 0.0435 to 0.244],  $p = 4.97 \times 10^{-3}$ ), and  
197 produced a consistent, although non-significant, effect estimate for the association with risk for all  
198 stroke (**Supplementary Table 10**). For CDCP1, the sensitivity analyses identified a consistent,  
199 although non-significant, effect estimate for the association with risk for intracranial aneurysm.

200 To assess whether between-population heterogeneity in pQTL effects could have affected our  
201 findings, we sought to replication using random effects meta-analysis (**Supplementary Table 10**). For  
202 genetically predicted CA14, this approach supported the significant associations with hippocampal

203 volume ( $\beta = 0.0953$  [95% CI: 0.0586 to 0.132],  $p = 3.63 \times 10^{-7}$ ), and risk for all stroke (OR = 1.06 [95%  
204 CI: 1.03 to 1.09],  $p = 2.56 \times 10^{-4}$ ). For genetically predicted CDCP1, it was only possible to assess the  
205 association with risk for intracranial aneurysm using a single IV; this identified a significant  
206 association (OR = 1.32 [95% CI: 1.08 to 1.61],  $p = 6.93 \times 10^{-3}$ ).

207 Pairwise Conditional Analysis and Co-localisation Analyses (PWCoCo) were performed to assess the  
208 presence of a shared variant for each of the five proteins-of-interest and the same outcomes as  
209 assessed by two-sample MR analyses. We were only adequately powered to assess co-localisation  
210 between SNPs associated with one pair of traits: MOG plasma level and cognitive function. We did  
211 not observe any evidence in support of co-localisation or conditional co-localisation (posterior  
212 probability (PP)<sub>4</sub>/PP<sub>3</sub>  $\leq 4.81 \times 10^{-4}$ ).

### 213 3. Discussion

214 In this large-scale analysis of the associations between the plasma levels of 1160 proteins and  
215 cognitive function, we identify CA14 and CDCP1 as being associated with processing speed, as  
216 measured by the DSST, and having potentially causal effects on hippocampal volume and stroke  
217 (CA14)and intracranial aneurysm (CDCP1).

218 Other proteins (BCAN, NCAN, and MOG) were associated with DSST performance and important  
219 structural brain phenotypes, with cerebral white matter volume mediating a significant proportion  
220 (13-19%) of the relationship between the levels of all three proteins and DSST performance, and  
221 WMH volume mediating 8% of the relationship between BCAN levels and DSST performance. A lack  
222 of genetic instruments precluded the assessment of potentially causal effects of BCAN and NCAN  
223 with any outcome-of-interest, and MOG with several outcomes-of-interest.. Enrichment analyses of  
224 proteins that were nominally significantly associated with DSST performance revealed a significant  
225 enrichment for brain-expressed proteins.

226 There were no significant associations between plasma protein levels and performance on the  
227 MoCA. This might reflect the fact that the MoCA is a screening tool for mild cognitive impairment<sup>[11]</sup>,  
228 meaning its sensitivity to detect variation in cognitive function in non-clinical groups is likely to be  
229 limited. The maximum MoCA score is 30 and scores higher than 26 indicate normal function. A high  
230 mean score (26.5) and a left-skewed distribution indicate a ceiling effect, which likely limited power  
231 to detect associations between protein levels and MoCA score in PURE-MIND.

232 CA14 is one of fifteen isoforms of the carbonic anhydrase family of zinc metalloprotease enzymes,  
233 which catalyse the reversible hydration of carbon dioxide<sup>[12]</sup>. CA14 is expressed by neurons<sup>[13]</sup> and  
234 involved in regulating extracellular pH following synaptic transmission<sup>[14, 15]</sup>. Consistent with our  
235 findings, acute inhibition of CA14 leads to impaired performance on cognitive tasks in mice<sup>[16]</sup>.  
236 Carbonic anhydrase activation may lead to beneficial cognitive effects in rodents<sup>[17]</sup>. In keeping with  
237 our MR results, there are neuroprotective effects of carbonic anhydrase inhibition in models of

238 amyloidosis, Huntington’s disease, and ischaemic and haemorrhagic stroke <sup>[17]</sup>. The mechanisms by  
239 which carbonic anhydrase inhibition and activation exert their effects are uncertain <sup>[16, 17]</sup>. FDA-  
240 approved carbonic anhydrase inhibitors, and thus the majority of carbonic anhydrase inhibitors  
241 investigated to date, are pan-carbonic anhydrase inhibitors. Of the carbonic anhydrase family  
242 members measured in our study (CA1, 2, 3, 4, 5A, 6, 9, 12, 13, and 14), only CA14 levels were  
243 significantly associated with DSST performance. Further studies are required to determine the  
244 therapeutic potential for carbonic anhydrase modulation in the context of cognitive impairment,  
245 Alzheimer’s disease, and stroke.

246 The extracellular matrix (ECM) proteins NCAN and BCAN are brain-specific chondroitin sulfate  
247 proteoglycans, which are expressed by neurons and astrocytes (NCAN and BCAN), and  
248 oligodendrocytes (BCAN). They contribute to the formation of a specialised structure, the  
249 perineuronal net (PNN), which plays a key role in memory and neuronal plasticity, and which is  
250 disrupted in Alzheimer’s disease <sup>[18]</sup>. Our findings are consistent with those of Harris et al. (2020) <sup>[5]</sup>,  
251 who found plasma levels of NCAN and BCAN were positively associated with brain volume. Plasma  
252 levels of both NCAN and BCAN have previously been shown to be positively associated with general  
253 cognitive function and DSST performance <sup>[9]</sup>, whilst BCAN levels have been found to be positively  
254 associated with Mini Mental State Examination performance and reduced in patients with  
255 Alzheimer’s disease or mild cognitive impairment <sup>[7]</sup>. Mice that are lacking either NCAN or BCAN  
256 expression show normal development and memory function but reduced hippocampal long term  
257 potentiation <sup>[19, 20]</sup>, whilst quadruple knock-outs, which lack NCAN, BCAN, and two additional ECM  
258 proteins (tenascin-C and tenascin-R) show an altered ratio of excitatory to inhibitory synapses and a  
259 reduction in the number and complexity of hippocampal PNNs <sup>[21]</sup>. Genetic variation in the gene  
260 encoding A Disintegrin and Metalloproteinase with Thrombospondin Motifs 4 (ADAMTS4), which  
261 degrades the four members of the lectican family (including NCAN and BCAN), has been implicated  
262 in Alzheimer’s disease <sup>[22]</sup>. Taken together, the evidence suggests NCAN, BCAN and their regulators  
263 as molecules-of-interest in Alzheimer’s disease.

264 MOG is an oligodendrocyte-expressed membrane glycoprotein, the exact function of which is  
265 unknown<sup>[23]</sup>.

266 CDCP1 is a widely expressed transmembrane glycoprotein that acts as a ligand for T cell-expressed  
267 Cluster of Differentiation 6 (CD6), and is implicated in autoimmune conditions<sup>[24]</sup>. CDCP1 is  
268 amenable to modulation by approved drug treatments: Itolizumab, which is used to treat psoriasis,  
269 disrupts CDCP1-CD6 binding and downregulates T-cell-mediated inflammation<sup>[25]</sup>, whilst  
270 atomoxetine, a treatment for attention deficit hyperactivity disorder, which is being considered for  
271 the treatment of mild cognitive impairment, reduced cerebrospinal fluid (CSF) CDCP1 levels<sup>[26]</sup>.  
272 Intriguingly, findings in mice suggest a functional link between CDCP1 and MOG<sup>[6]</sup>.

273 Our study has several strengths. We measured 1160 proteins, associated with a wide range of  
274 physiological processes, in a large, well-characterised cohort. Replication analyses, where possible,  
275 were performed in an independent cohort in which proteins were measured using an independent  
276 methodology. The availability of genetic and brain MRI data permitted an exploration of causality  
277 and putative causal pathways. The use of MR to identify potentially causal associations will have  
278 offered protection against some of the common confounders of observational analyses<sup>[27]</sup>, with the  
279 use of multiple MR methods, which generally gave concordant estimates of effect, mitigating against  
280 the individual biases of different MR methodologies<sup>[28]</sup>. Moreover, by requiring instrumental  
281 variables to be located in *cis* to their target protein, we limited the chance of pleiotropic effects<sup>[29]</sup>.

282 There are also several limitations to consider.

283 First, the 1160 proteins measured represent a small subset of the circulating proteome<sup>[30]</sup>. Although  
284 these proteins are involved in a wide range of biological functions represented by all 13 Olink Target  
285 96 panels, limitations to our understanding of the proteome mean that it is not possible to assess the  
286 extent to which these proteins are representative of the rest of the proteome. Replication analyses  
287 were only performed for those proteins for which data were available in the GS cohort, meaning  
288 that we did not assess replication of CA14 or MOG.

289 Second, the availability of suitable IVs mean that our primary MR analyses were only performed for  
290 CA14, CDCP1, and MOG. Whilst we required a minimum of three IVs for the primary MR analyses,  
291 our sensitivity analyses, in which a stricter threshold for independence was applied to the IVs  
292 necessitated the use of fewer than three IVs in each analysis. As such, the results of the sensitivity  
293 analyses should be interpreted with this caveat in mind.

294 Third, for all but one pair of traits, we were insufficiently powered to assess co-localisation between  
295 genetic variants associated with protein level and cognition, structural brain phenotypes, and  
296 disease outcomes. This means that it is possible that significant MR findings might reflect the  
297 presence of separate causal variants in linkage disequilibrium (LD) with one another<sup>[31]</sup>

298 Fourth, we measured protein levels in the plasma, rather than in the brain or CSF. It is, however,  
299 important to note the striking enrichment for brain-expressed proteins amongst the DSST-associated  
300 proteins. Previous analyses of the GS cohort, in which replication was sought in the present study,  
301 have identified the levels of several plasma proteins as being associated with multiple markers of  
302 brain health<sup>[8]</sup>. These findings support the use of the plasma to assess brain-related phenotypes and  
303 emphasise the need for additional research to explain the mechanisms controlling the efflux of  
304 brain-expressed proteins into the bloodstream in non-clinical populations. Moreover, the use of *cis*  
305 pQTLs, which are likely to be shared across tissues<sup>[32]</sup>, as IVs in our MR analyses, supports the  
306 possibility that the MR-identified associations reflect the actions of the proteins-of-interest in the  
307 brain.

308 In summary, we identified protein biomarkers of cognitive function that may causally affect brain  
309 structure and risk for stroke and intracranial aneurysm. Notwithstanding the need for replication,  
310 our findings prompt several hypotheses that should be assessed by future studies. Our apparently  
311 paradoxical findings of higher CA14 levels being associated with both better cognitive function and  
312 increased stroke risk suggest that molecular findings can inform a more nuanced understanding of  
313 the relationship between premorbid cognitive function and neurological disease risk. It is possible



314 that improved risk stratification may be achieved through the combination of cognitive assessment  
315 and biomarker measurement. The availability of approved drugs targeting our identified proteins  
316 raises the possibility of drug repurposing for novel therapeutic interventions to prevent cognitive  
317 decline, stroke, and intracranial aneurysm.

318

## 319 4. Methods

### 320 Sample information

321 This study used data from participants of self-reported European (N = 3514), Latin (N = 4309), or  
322 Persian (N = 1332) ancestry from the Population Urban Rural Epidemiology (PURE) biomarker sub-  
323 study <sup>[33]</sup> (**Supplementary Information**). African (n=659), South Asian (n=604), East Asian (n=314),  
324 and Arab (n=204) participants were excluded to align PURE genetic data with external genetic  
325 datasets, which are predominantly European. Participants of Latin and Persian ancestry were  
326 included due to their genetic overlap with European participants <sup>[33]</sup>.

327 The PURE biomarker study also included European participants enrolled in PURE-MIND (N = 1198) <sup>[10]</sup>  
328 (**Supplementary Information**).

329 The European, Latin, and Persian PURE biomarker cohort participants were used to identify protein  
330 biomarker pQTLs <sup>[33]</sup>, for use in MR analyses, whilst data from the European PURE-MIND biomarker  
331 participants were used for observational association analyses.

332 We sought replication of our observational findings in GS <sup>[34, 35]</sup>, which was recruited through re-  
333 contact of the Generation Scotland: Scottish Family Health Study (GS:SFHS) <sup>[36, 37]</sup>. GS:SFHS is a  
334 population- and family-based cohort of >24,000 individuals from Scotland. GS:SFHS participants  
335 were recruited between 2006 and 2011. Upon recruitment, participants attended a clinic where  
336 detailed health, cognitive, and lifestyle information, and biological samples were collected. Between  
337 2015 and 2018, a subset of the GS:SFHS participants completed additional health and cognitive  
338 assessments, brain MRI, and provided blood samples for proteomic analysis. Up to 1053 GS  
339 participants were available for replication analyses.

### 340 Ethical approval

341 All centres contributing to PURE were required to obtain approval from their respective ethics  
342 committees (Institutional Review Boards). Participant data is confidential and only authorized

343 individuals can access study-related documents. The participants' identities are protected in  
344 documents transmitted to the Coordinating Office, as well as biomarker and genetic data.  
345 Participants provided informed consent to obtain baseline information, and to collect and store  
346 genetic and other biological specimens.

347 The GS:SFHS obtained ethical approval from the NHS Tayside Committee on Medical Research  
348 Ethics, on behalf of the National Health Service (reference: 05/S1401/89). All participants provided  
349 broad and enduring written informed consent for biomedical research. GS:SFHS has Research Tissue  
350 Bank Status (reference: 15/ES/0040), providing generic ethical approval for a wide range of uses  
351 within medical research. The imaging subsample of GS:SFHS (referred to as "GS" herein) received  
352 ethical approval from the NHS Tayside committee on research ethics (reference 14/SS/0039). All  
353 experimental methods were in accordance with the Helsinki declaration.

#### 354 **Assessment of between-cohort differences**

355 Between cohort differences in quantitative variables (age, DSST score, BMI, blood pressure, and  
356 brain MRI volumes) were assessed using two-sample t-tests. Categorical variables (sex, education  
357 type, and disease status) where the smallest count in any cell of the contingency table was greater  
358 than five were assessed using a chi-squared test; otherwise, a Fisher's Exact Test was employed.  
359 Statistical significance was defined as  $p < 0.05$ .

#### 360 **Assessment of cognitive function**

361 General cognitive ability was measured in PURE-MIND and GS by trained assessors using the DSST  
362 (Wechsler Adult Intelligence Scale, 3rd Edition) <sup>[38]</sup>. The DSST is a pencil and paper test in which  
363 participants must match symbols to numbers according to a key. Participants were scored according  
364 to the number of correct matches made within two minutes (maximum score: 133). The DSST  
365 measures several cognitive functions, including associative learning and executive function <sup>[39]</sup>, and  
366 DSST performance is highly correlated with the general intelligence factor,  $g$ . PURE-MIND

367 participants completed the Montreal Cognitive Assessment (MoCA) <sup>[11]</sup>, a questionnaire-based test  
368 with scores 0 to 30. A score of 26 or higher is considered normal <sup>[11]</sup>.

### 369 **Measurement of plasma protein expression**

370 In the PURE biomarker cohort, 1196 plasma protein levels were measured by proximity extension  
371 assay using the Olink Proseek Target 96 reagent kit (Olink, Uppsala, Sweden) in 12066 participants  
372 (including 3735 European, 4695 Latin, and 1436 Persian). Following pre-processing and quality  
373 control steps (**Supplementary Information**), measurements were available for 1160 biomarkers in  
374 8369-9154 European, Latin, or Persian participants (depending on biomarker-specific missingness).

375 In GS, plasma protein levels were measured with the SOMAscan assay platform (SomaLogic Inc.), as  
376 described previously <sup>[40]</sup>. Following initial data processing and quality control steps, measures of  
377 4058 proteins were available in 1095 participants. Prior to analysis, protein abundance  
378 measurements were log-transformed and rank-based inverse normalised.

### 379 **Brain imaging**

380 PURE-MIND participants enrolled in the PURE biomarker cohort were scanned at four sites in Canada  
381 (three at 1.5T (two on General Electric (GE) scanners, one on a Phillips scanner), one at 3T (GE)). The  
382 brain imaging phenotypes assessed in this study were total brain volume (excluding ventricles), total  
383 white matter volume, hippocampal volume, average cortical thickness, a multi-region composite  
384 thickness measure designed to differentiate Alzheimer's disease patients from clinically normal  
385 participants <sup>[41]</sup>, silent brain infarcts (SBI), cerebral microbleeds (CMB), and WMH volumes. These will  
386 henceforth be referred to as the "structural brain phenotypes". Further information about the  
387 derivation of the structural brain phenotypes is available in the **Supplementary Information**.

### 388 **Genotyping and imputation of PURE-MIND**

389 PURE participant genotypes (ThermoFisher Axiom Precision Medicine Research Array r.3) were called  
390 using Axiom Power Tools and in-house scripts. Quality control steps are described in the  
391 **Supplementary Information**.

392 Imputation was performed on the 749,783 genotyped variants following the TOPMed Imputation  
393 server pipeline (<https://imputation.biodatacatalyst.nih.gov/>). Further details are in the  
394 **Supplementary Information**.

### 395 **Assessment of the association between protein biomarkers and cognitive function and structural** 396 **imaging phenotypes**

397 We assessed the association between standardised protein levels and cognitive and structural brain  
398 phenotypes using two-tailed linear (DSST, MoCA, total brain volume, white matter volume,  
399 hippocampal volume, WMH volume, cortical thickness) or logistic (CMB, SBI) regression. The  
400 cognitive or structural brain phenotype-of-interest was the dependent variable with the  
401 standardised protein expression level, age, age<sup>2</sup>, sex, and the first ten genetic principal components  
402 as independent variables. A sensitivity analysis was performed for DSST-associated proteins in which  
403 we further adjusted for education (a categorical variable with levels: (i) no education; (ii) high school  
404 or less; (iii) trade school; and (iv) college or university). We calculated Pearson's correlation  
405 coefficient to assess the pairwise correlations between DSST-associated proteins. Within each  
406 analysis, we applied a Bonferroni correction to determine statistical significance, yielding the  
407 following significance thresholds:  $p < 4.31 \times 10^{-5}$  when assessing associations with 1160 proteins;  $p <$   
408  $2.5 \times 10^{-3}$  when assessing associations with the five DSST-associated proteins across four DSST-  
409 associated structural brain phenotypes; and  $p < 5 \times 10^{-3}$  when assessing 10 pairwise correlations  
410 between proteins.

411 We performed replication analyses in GS for the significant proteins identified in PURE-MIND. Two-  
412 tailed mixed effects models were fitted using the `lmekin` function from the R package `coxme` v.2.2.17  
413 <sup>[42]</sup> to assess the association of the outcome variable (DSST performance, total brain volume

414 (excluding ventricles), cerebral white matter volume, hippocampal volume, and WMH volume) with  
415 standardised protein expression, covarying for age, age<sup>2</sup>, sex, study site (Dundee or Aberdeen), the  
416 delay between blood sampling and protein extraction, depression (a binary variable representing  
417 lifetime depression status), and a kinship matrix. When a brain volume phenotype was the outcome  
418 variable, additional covariates were included to account for ICV, the interaction between ICV and  
419 study site (to account for a site-associated batch effect on ICV measurement), and whether there  
420 was manual intervention using tools within Freesurfer during the quality control process. Replication  
421 was defined as a concordant direction of effect, meeting a Bonferroni-corrected threshold of  $p <$   
422  $1.67 \times 10^{-2}$  (accounting for the assessment of three DSST-associated proteins) or  $p < 7.14 \times 10^{-3}$   
423 (accounting for the assessment of seven structural brain phenotype-protein combinations).

#### 424 **Assessment of the association of DSST performance with MRI-derived structural brain phenotypes**

425 To identify mediators of the association between protein expression and DSST performance, we first  
426 established the structural brain phenotypes that satisfied the requirements of potential mediators  
427 (i.e. associated with both DSST performance and at least one DSST-associated protein), and then  
428 formally tested the mediation relationship by bootstrap mediation analyses.

429 We estimated the association between DSST performance and structural brain phenotypes in PURE-  
430 MIND using linear models. All brain volume measurements were normalised to ICV and the models  
431 included covariates for age, age<sup>2</sup>, sex, and the first ten genetic principal components. We defined  
432 statistical significance as  $p < 0.00625$  (Bonferroni correction for eight phenotypes; two-tailed) and  
433 sought replication of significant associations ( $N = 5$ ) in GS. In GS, brain volumes were residualised for  
434 ICV, scanner location, the interaction between ICV and scanner location, and whether there was  
435 manual intervention during the quality control process. The resultant residuals were included as the  
436 dependent variable in a mixed effects model with DSST score, age, age<sup>2</sup>, sex, depression, and a  
437 kinship matrix as independent variables. Statistical significance was defined as  $p < 0.0125$  (two-  
438 tailed).

439 The DSST performance-associated brain MRI phenotypes (N = 4) were assessed as potential  
440 mediators of the protein level-DSST associations (N = 3, yielding a total of N = 9 mediations to assess)  
441 using bootstrap mediation analysis in PURE-MIND. Analyses were performed using the R package  
442 “mediation”<sup>[43]</sup> with 1000 bootstraps. We corrected for the nine potential mediation relationships  
443 assessed using a Bonferroni-corrected threshold of  $p < 5.56 \times 10^{-3}$ .

#### 444 **Functional and tissue-specific expression enrichment analyses**

445 Proteins associated with DSST performance at  $p < 0.05$  in PURE-MIND were included in functional  
446 and tissue-specific expression analyses in three groups: (i) all proteins; (ii) positively associated  
447 proteins; and (iii) negatively associated proteins. Enrichment was assessed relative to all proteins in  
448 our dataset that passed quality control (N =1160). Functional enrichment analyses were performed  
449 using WebGestalt (<http://www.webgestalt.org/>)<sup>[44]</sup> using default parameter settings for the over-  
450 representation analysis method to assess enrichment for: (i) gene ontology categories (biological  
451 processes, molecular functions, and cellular compartments); (ii) Reactome pathways; and (iii)  
452 disease-associated genes (Disgenet). Tissue-specific enrichment analyses were performed using the  
453 “GTEx v8: 54 tissue types” and “GTEx v8: 30 general tissue types” gene expression datasets in  
454 FUnctional Mapping and Annotation (FUMA)<sup>[45]</sup>. For both the functional enrichment and tissue  
455 expression analyses, enrichment was assessed using a hypergeometric test and significant  
456 enrichment was defined as a Benjamini-Hochberg-adjusted  $p < 0.05$ , correcting for the number of  
457 tests performed within each analysis platform. Analyses were performed using web interfaces  
458 accessed on 18/04/2022 (WebGestalt and FUMA) and 14/01/2023 (FUMA).

#### 459 **Two-sample forward MR analyses**

460 We performed two-sample forward MR analyses to identify potentially causal associations between  
461 genetically predicted plasma protein levels and: (i) cognitive function; (ii) structural brain  
462 phenotypes (total brain volume, cerebral white matter volume, hippocampal volume, WMH volume,

463 and CMB); and (iii) disease outcomes (Alzheimer's disease, all stroke, stroke subtypes (ischaemic,  
464 cardioembolic, large artery, and small vessel), and intracranial aneurysm).

465 Associations between single nucleotide polymorphisms (SNPs) and plasma protein expression levels  
466 were calculated in PURE (**Supplemental Information**). Following quality control, a set of pQTLs that  
467 was independent ( $r^2 < 0.1$ ) in all three populations was retained. Sensitivity analyses were performed  
468 in which the pruning threshold was adjusted to  $r^2 < 0.01$ .

469 The independent set of pQTLs were assessed for their associations with cognitive function, structural  
470 brain phenotypes, and disease outcomes using summary statistics from published studies <sup>[46-53]</sup>.

471 MR analyses were performed using the R packages MRBase for TwoSample MR v.0.5.6 <sup>[54]</sup>, mr.raps  
472 v.0.4.1 <sup>[55]</sup>, and MRPRESSO v.1.0 <sup>[56]</sup>. We employed several complementary MR approaches: IVW <sup>[57]</sup>,  
473 weighted median <sup>[58]</sup>, robust adjusted profile scores (RAPS) <sup>[55]</sup>, MR-Egger <sup>[59]</sup>, and MR-PRESSO <sup>[56]</sup>. We  
474 adopted the IVW approach as our primary methodology and defined statistical significance using a  
475 liberal within-outcome variable Bonferroni correction for the proteins (CA14, CDCP1, and MOG) that  
476 could be assessed, yielding a significance threshold of  $p < 0.0167$  (or  $p < 0.025$  or  $0.05$  when an  
477 outcome could only be assessed for two or one protein(s)). Further details of the MR analyses are  
478 included in the **Supplementary Information**.

#### 479 **Pairwise Conditional Analysis and Co-localisation Analysis (PWCoCo)**

480 PWCoCo <sup>[31, 60]</sup> was performed to assess the existence of a shared causal variant between (i) pQTLs  
481 for each of the five proteins-of-interest and (ii) variants associated with the outcomes assessed in  
482 the two-sample MR analyses (**Supplementary Information**).

#### 483 **Software**

484 Statistical analyses and plot generation were performed in R (versions 3.6.0, 4.1.1, 4.1.2, 4.2.0,  
485 4.2.1).

#### 486 **Data availability**



487 The terms of consent for PURE participants preclude the sharing of individual-level data. Individual  
488 level data is available through collaboration with PURE researchers  
489 (<https://www.phri.ca/research/pure/>). Summary-statistics for the analyses presented here are  
490 available in the supplementary materials.

491 According to the terms of consent for GS participants, applications for individual-level data must be  
492 reviewed by the GS Access Committee ([access@generationscotland.org](mailto:access@generationscotland.org)). Complete summary  
493 statistics are available in the supplementary materials for the protein-DSST score associations  
494 assessed in this study.

#### 495 **Code availability**

496 The code used to generate the results in this study is available on reasonable request from the  
497 corresponding author.

#### 498 **Funding and acknowledgements**

##### 499 *PURE*

500 The PURE study is an investigator-initiated study that is funded by the Population Health Research  
501 Institute, the Canadian Institutes of Health Research (CIHR), Heart and Stroke Foundation of Ontario,  
502 support from CIHR's Strategy for Patient Oriented Research, through the Ontario SPOR Support Unit,  
503 as well as the Ontario Ministry of Health and Long-Term Care and through unrestricted grants from  
504 several pharmaceutical companies (with major contributions from AstraZeneca [Canada], Sanofi-  
505 Aventis [France and Canada], Boehringer Ingelheim [Germany and Canada], Servier, and  
506 GlaxoSmithKline), and additional contributions from Novartis and King Pharma and from various  
507 national or local organisations in participating countries as follows: Argentina—Fundacion ECLA;  
508 Bangladesh—Independent University, Bangladesh and Mitra and Associates; Brazil—Unilever Health  
509 Institute, Brazil; Canada—Public Health Agency of Canada and Champlain Cardiovascular Disease  
510 Prevention Network; Chile—Universidad de la Frontera; Colombia—Colciencias (grant number 6566–

511 04–18062); South Africa—The North-West University, SANPAD (SA and Netherlands Programme for  
512 Alternative Development), National Research Foundation, Medical Research Council of South Africa,  
513 The South Africa Sugar Association, Faculty of Community and Health Sciences; Sweden—grants  
514 from the Swedish State under the Agreement concerning research and education of doctors, the  
515 Swedish Heart and Lung Foundation, the Swedish Research Council, the Swedish Council for Health,  
516 Working Life and Welfare, King Gustaf V's and Queen Victoria Freemasons Foundation, AFA  
517 Insurance, Swedish Council for Working Life and Social Research, Swedish Research Council for  
518 Environment, Agricultural Sciences and Spatial Planning, grant from the Swedish State under  
519 (LäkarUtbildningsAvtalet) Agreement, and grant from the Västra Götaland Region; and United Arab  
520 Emirates—Sheikh Hamdan Bin Rashid Al Maktoum Award for Medical Sciences, Dubai Health  
521 Authority, Dubai. The PURE biomarker project was supported by Bayer and the CIHR. The biomarker  
522 project was led by PURE investigators at the Population Health Research Institute (Hamilton,  
523 Canada) in collaboration with Bayer scientists. Bayer directly compensated the Population Health  
524 Research Institute for measurement of the biomarker panels, scientific, methodological, and  
525 statistical work. Genetic analyses were supported by CIHR (G-18–0022359) and Heart and Stroke  
526 Foundation of Canada (application number 399497) in the form of funding to GP.

527 GS

528 This work was supported by the Wellcome Trust [104036/Z/14/Z, 220857/Z/20/Z, and  
529 216767/Z/19/Z ] and an MRC Mental Health Data Pathfinder Grant [MC\_PC\_17209] to AMM. DAG is  
530 funded by the Wellcome Trust Translational Neuroscience PhD Programme at the University of  
531 Edinburgh [108890/Z/15/Z]. LS and ANH are supported by Medical Research Council  
532 [MR/L023784/2]: Dementias Platform UK. LS is also supported by a Medical Research Council Award  
533 to the University of Oxford [MC\_PC\_17215]. AS is supported through the Wellcome-University of  
534 Edinburgh Institutional Strategic Support Fund (Reference 204804/Z/16/Z), and indirectly through  
535 the Lister Institute of Preventive Medicine award with reference 173096. Generation Scotland

536 received core support from the Chief Scientist Office of the Scottish Government Health Directorates  
537 [CZD/16/6] and the Scottish Funding Council [HR03006]. Genotyping of the GS:SFHS samples was  
538 carried out by the Genetics Core Laboratory at the Clinical Research Facility, Edinburgh, Scotland,  
539 and was funded by the UK's Medical Research Council and the Wellcome Trust [104036/Z/14/Z].

540 We are grateful to all the families who took part in Generation Scotland, the general practitioners  
541 and the Scottish School of Primary Care for their help in recruiting them, and the whole Generation  
542 Scotland team, which includes interviewers, computer and laboratory technicians, clerical workers,  
543 research scientists, volunteers, managers, receptionists, healthcare assistants and nurses.

544 We thank Dr Alison Offer for assistance in producing the forest plots.

#### 545 **Conflicts of interest**

546 MC is supported by a Canadian Institute of Health Research doctoral award and has received  
547 consulting fees from Bayer AG. MP is supported by the EJ Moran Campbell Internal Career Research  
548 Award from McMaster University. DAG is a part-time employee of Optima partners, a health data  
549 consultancy based at the Bayes centre, The University of Edinburgh. SH is an employee of Bayer AG.  
550 AMM has previously received speaker's fees from Illumina and Janssen and research grant funding  
551 from The Sackler Trust. SY is supported by the Heart and Stroke Foundation/Marion W Burke Chair in  
552 Cardiovascular Disease. GP is supported by the CISCO Professorship in Integrated Health Systems.  
553 The other authors declare no competing interests.

554

555 **References**

- 556 1. Martin, G.M., *Defeating Dementia*. Nature, 2004. **431**: p. 247-248.
- 557 2. Rostamian, S., S. Mahinrad, T. Stijnen, B. Sabayan, and A.J. de Craen, *Cognitive impairment*  
558 *and risk of stroke: a systematic review and meta-analysis of prospective cohort studies*.  
559 Stroke, 2014. **45**(5): p. 1342-8.
- 560 3. Valenzuela, M.J. and P. Sachdev, *Brain reserve and dementia: a systematic review*. Psychol  
561 Med, 2006. **36**(4): p. 441-54.
- 562 4. Pettigrew, C. and A. Soldan, *Defining Cognitive Reserve and Implications for Cognitive Aging*.  
563 Curr Neurol Neurosci Rep, 2019. **19**(1): p. 1.
- 564 5. Harris, S.E., S.R. Cox, S. Bell, R.E. Marioni, B.P. Prins, A. Pattie, et al., *Neurology-related*  
565 *protein biomarkers are associated with cognitive ability and brain volume in older age*. Nat  
566 Commun, 2020. **11**(1): p. 800.
- 567 6. Lindbohm, J.V., N. Mars, K.A. Walker, A. Singh-Manoux, G. Livingston, E.J. Brunner, et al.,  
568 *Plasma proteins, cognitive decline, and 20-year risk of dementia in the Whitehall II and*  
569 *Atherosclerosis Risk in Communities studies*. Alzheimers Dement, 2022. **18**(4): p. 612-624.
- 570 7. Whelan, C.D., N. Mattsson, M.W. Nagle, S. Vijayaraghavan, C. Hyde, S. Janelidze, et al.,  
571 *Multiplex proteomics identifies novel CSF and plasma biomarkers of early Alzheimer's*  
572 *disease*. Acta Neuropathol Commun, 2019. **7**(1): p. 169.
- 573 8. Gadd, D.A., R.F. Hillary, D.L. McCartney, L. Shi, A. Stolicyn, N.A. Robertson, et al., *Integrated*  
574 *methylome and phenome study of the circulating proteome reveals markers pertinent to*  
575 *brain health*. Nat Commun, 2022. **13**(1): p. 4670.
- 576 9. Tin, A., A.E. Fohner, Q. Yang, J.A. Brody, G. Davies, J. Yao, et al., *Identification of circulating*  
577 *proteins associated with general cognitive function among middle-aged and older adults*.  
578 Communications Biology, 2023. **6**(1): p. 1117.

- 579 10. Smith, E.E., M. O'Donnell, G. Dagenais, S.A. Lear, A. Wielgosz, M. Sharma, et al., *Early*  
580 *cerebral small vessel disease and brain volume, cognition, and gait*. *Ann Neurol*, 2015. **77**(2):  
581 p. 251-61.
- 582 11. Nasreddine, Z.S., N.A. Phillips, V. Bedirian, S. Charbonneau, V. Whitehead, I. Collin, et al., *The*  
583 *Montreal Cognitive Assessment, MoCA: a brief screening tool for mild cognitive impairment*. *J*  
584 *Am Geriatr Soc*, 2005. **53**(4): p. 695-9.
- 585 12. Lindskog, S., *Structure and mechanism of carbonic anhydrase*. *Pharmacol Ther*, 1997. **74**(1):  
586 p. 1-20.
- 587 13. Parkkila, S., A.K. Parkkila, H. Rajaniemi, G.N. Shah, J.H. Grubb, A. Waheed, et al., *Expression*  
588 *of membrane-associated carbonic anhydrase XIV on neurons and axons in mouse and human*  
589 *brain*. *Proc Natl Acad Sci U S A*, 2001. **98**(4): p. 1918-23.
- 590 14. Chen, J.C. and M. Chesler, *pH transients evoked by excitatory synaptic transmission are*  
591 *increased by inhibition of extracellular carbonic anhydrase*. *Proc Natl Acad Sci U S A*, 1992.  
592 **89**(16): p. 7786-90.
- 593 15. Shah, G.N., B. Ulmasov, A. Waheed, T. Becker, S. Makani, N. Svichar, et al., *Carbonic*  
594 *anhydrase IV and XIV knockout mice: roles of the respective carbonic anhydrases in buffering*  
595 *the extracellular space in brain*. *Proc Natl Acad Sci U S A*, 2005. **102**(46): p. 16771-6.
- 596 16. Provensi, G., F. Carta, A. Nocentini, C.T. Supuran, F. Casamenti, M.B. Passani, et al., *A New*  
597 *Kid on the Block? Carbonic Anhydrases as Possible New Targets in Alzheimer's Disease*. *Int J*  
598 *Mol Sci*, 2019. **20**(19).
- 599 17. Lemon, N., E. Canepa, M.A. Ilies, and S. Fossati, *Carbonic Anhydrases as Potential Targets*  
600 *Against Neurovascular Unit Dysfunction in Alzheimer's Disease and Stroke*. *Front Aging*  
601 *Neurosci*, 2021. **13**: p. 772278.
- 602 18. Sorg, B.A., S. Berretta, J.M. Blacktop, J.W. Fawcett, H. Kitagawa, J.C. Kwok, et al., *Casting a*  
603 *Wide Net: Role of Perineuronal Nets in Neural Plasticity*. *J Neurosci*, 2016. **36**(45): p. 11459-  
604 11468.

- 605 19. Brakebusch, C., C.I. Seidenbecher, F. Asztely, U. Rauch, H. Matthies, H. Meyer, et al.,  
606 *Brevican-deficient mice display impaired hippocampal CA1 long-term potentiation but show*  
607 *no obvious deficits in learning and memory.* Mol Cell Biol, 2002. **22**(21): p. 7417-27.
- 608 20. Zhou, X.H., C. Brakebusch, H. Matthies, T. Oohashi, E. Hirsch, M. Moser, et al., *Neurocan is*  
609 *dispensable for brain development.* Mol Cell Biol, 2001. **21**(17): p. 5970-8.
- 610 21. Gottschling, C., D. Wegrzyn, B. Denecke, and A. Faissner, *Elimination of the four extracellular*  
611 *matrix molecules tenascin-C, tenascin-R, brevican and neurocan alters the ratio of excitatory*  
612 *and inhibitory synapses.* Sci Rep, 2019. **9**(1): p. 13939.
- 613 22. Marioni, R.E., S.E. Harris, Q. Zhang, A.F. McRae, S.P. Hagenaars, W.D. Hill, et al., *GWAS on*  
614 *family history of Alzheimer's disease.* Transl Psychiatry, 2018. **8**(1): p. 99.
- 615 23. Peschl, P., M. Bradl, R. Hoftberger, T. Berger, and M. Reindl, *Myelin Oligodendrocyte*  
616 *Glycoprotein: Deciphering a Target in Inflammatory Demyelinating Diseases.* Front Immunol,  
617 2017. **8**: p. 529.
- 618 24. Enyindah-Asonye, G., Y. Li, J.H. Ruth, D.S. Spassov, K.E. Hebron, A. Zijlstra, et al., *CD318 is a*  
619 *ligand for CD6.* Proc Natl Acad Sci U S A, 2017. **114**(33): p. E6912-E6921.
- 620 25. Dogra, S., S. Uprety, and S.H. Suresh, *Itolizumab, a novel anti-CD6 monoclonal antibody: a*  
621 *safe and efficacious biologic agent for management of psoriasis.* Expert Opin Biol Ther, 2017.  
622 **17**(3): p. 395-402.
- 623 26. Levey, A.I., D. Qiu, L. Zhao, W.T. Hu, D.M. Duong, L. Higginbotham, et al., *A phase II study*  
624 *repurposing atomoxetine for neuroprotection in mild cognitive impairment.* Brain, 2022.  
625 **145**(6): p. 1924-1938.
- 626 27. Lawlor, D.A., R.M. Harbord, J.A. Sterne, N. Timpson, and G. Davey Smith, *Mendelian*  
627 *randomization: using genes as instruments for making causal inferences in epidemiology.*  
628 *Stat Med*, 2008. **27**(8): p. 1133-63.
- 629 28. Slob, E.A.W. and S. Burgess, *A comparison of robust Mendelian randomization methods*  
630 *using summary data.* Genet Epidemiol, 2020. **44**(4): p. 313-329.

- 631 29. Swerdlow, D.I., K.B. Kuchenbaecker, S. Shah, R. Sofat, M.V. Holmes, J. White, et al., *Selecting*  
632 *instruments for Mendelian randomization in the wake of genome-wide association studies.*  
633 *Int J Epidemiol*, 2016. **45**(5): p. 1600-1616.
- 634 30. Omenn, G.S., L. Lane, C.M. Overall, F.J. Corrales, J.M. Schwenk, Y.K. Paik, et al., *Progress on*  
635 *Identifying and Characterizing the Human Proteome: 2018 Metrics from the HUPO Human*  
636 *Proteome Project.* *J Proteome Res*, 2018. **17**(12): p. 4031-4041.
- 637 31. Zheng, J., V. Haberland, D. Baird, V. Walker, P.C. Haycock, M.R. Hurle, et al., *Phenome-wide*  
638 *Mendelian randomization mapping the influence of the plasma proteome on complex*  
639 *diseases.* *Nat Genet*, 2020. **52**(10): p. 1122-1131.
- 640 32. Yang, C., F.H.G. Farias, L. Ibanez, A. Suhy, B. Sadler, M.V. Fernandez, et al., *Genomic atlas of*  
641 *the proteome from brain, CSF and plasma prioritizes proteins implicated in neurological*  
642 *disorders.* *Nat Neurosci*, 2021. **24**(9): p. 1302-1312.
- 643 33. Narula, S., S. Yusuf, M. Chong, C. Ramasundarahettige, S. Rangarajan, S.I. Bangdiwala, et al.,  
644 *Plasma ACE2 and risk of death or cardiometabolic diseases: a case-cohort analysis.* *Lancet*,  
645 2020. **396**(10256): p. 968-976.
- 646 34. Habota, T., A.L. Sandu, G.D. Waiter, C.J. McNeil, J.D. Steele, J.A. Macfarlane, et al., *Cohort*  
647 *profile for the STRatifying Resilience and Depression Longitudinally (STRADL) study: A*  
648 *depression-focused investigation of Generation Scotland, using detailed clinical, cognitive,*  
649 *and neuroimaging assessments.* *Wellcome Open Res*, 2021. **4**: p. 185.
- 650 35. Navrady, L.B., M.K. Wolters, D.J. MacIntyre, T.K. Clarke, A.I. Campbell, A.D. Murray, et al.,  
651 *Cohort Profile: Stratifying Resilience and Depression Longitudinally (STRADL): a questionnaire*  
652 *follow-up of Generation Scotland: Scottish Family Health Study (GS:SFHS).* *Int J Epidemiol*,  
653 2018. **47**(1): p. 13-14g.
- 654 36. Smith, B.H., A. Campbell, P. Linksted, B. Fitzpatrick, C. Jackson, S.M. Kerr, et al., *Cohort*  
655 *Profile: Generation Scotland: Scottish Family Health Study (GS:SFHS). The study, its*

- 656 *participants and their potential for genetic research on health and illness.* Int J Epidemiol,  
657 2013. **42**(3): p. 689-700.
- 658 37. Smith, B.H., H. Campbell, D. Blackwood, J. Connell, M. Connor, I.J. Deary, et al., *Generation*  
659 *Scotland: the Scottish Family Health Study; a new resource for researching genes and*  
660 *heritability.* BMC Med Genet, 2006. **7**: p. 74.
- 661 38. Wechsler, D., *Wechsler Adult Intelligence Scale-Third Edition (WAIS-III).* 1997, San Antonio:  
662 Harcourt Assessment Inc.
- 663 39. Jaeger, J., *Digit Symbol Substitution Test: The Case for Sensitivity Over Specificity in*  
664 *Neuropsychological Testing.* J Clin Psychopharmacol, 2018. **38**(5): p. 513-519.
- 665 40. Shi, L., N.J. Buckley, I. Bos, S. Engelborghs, K. Sleegers, G.B. Frisoni, et al., *Plasma Proteomic*  
666 *Biomarkers Relating to Alzheimer's Disease: A Meta-Analysis Based on Our Own Studies.*  
667 Front Aging Neurosci, 2021. **13**: p. 712545.
- 668 41. Schwarz, C.G., J.L. Gunter, H.J. Wiste, S.A. Przybelski, S.D. Weigand, C.P. Ward, et al., *A large-*  
669 *scale comparison of cortical thickness and volume methods for measuring Alzheimer's*  
670 *disease severity.* Neuroimage Clin, 2016. **11**: p. 802-812.
- 671 42. Therneau, T.M., *coxme: mixed effects Cox models.* 2012. p. R Package.
- 672 43. Tingley, D., T. Yamamoto, K. Hirose, L. Keele, and K. Imai, *mediation: R Package for Causal*  
673 *Mediation Analysis.* Journal of Statistical Software, 2014. **59**(5).
- 674 44. Liao, Y., J. Wang, E.J. Jaehnig, Z. Shi, and B. Zhang, *WebGestalt 2019: gene set analysis toolkit*  
675 *with revamped UIs and APIs.* Nucleic Acids Res, 2019. **47**(W1): p. W199-W205.
- 676 45. Watanabe, K., E. Taskesen, A. van Bochoven, and D. Posthuma, *Functional mapping and*  
677 *annotation of genetic associations with FUMA.* Nat Commun, 2017. **8**(1): p. 1826.
- 678 46. Savage, J.E., P.R. Jansen, S. Stringer, K. Watanabe, J. Bryois, C.A. de Leeuw, et al., *Genome-*  
679 *wide association meta-analysis in 269,867 individuals identifies new genetic and functional*  
680 *links to intelligence.* Nat Genet, 2018. **50**(7): p. 912-919.



- 681 47. Smith, S.M., G. Douaud, W. Chen, T. Hanayik, F. Alfaro-Almagro, K. Sharp, et al., *An expanded*  
682 *set of genome-wide association studies of brain imaging phenotypes in UK Biobank*. *Nat*  
683 *Neurosci*, 2021. **24**(5): p. 737-745.
- 684 48. Hibar, D.P., H.H.H. Adams, N. Jahanshad, G. Chauhan, J.L. Stein, E. Hofer, et al., *Novel genetic*  
685 *loci associated with hippocampal volume*. *Nat Commun*, 2017. **8**: p. 13624.
- 686 49. Persyn, E., K.B. Hanscombe, J.M.M. Howson, C.M. Lewis, M. Traylor, and H.S. Markus,  
687 *Genome-wide association study of MRI markers of cerebral small vessel disease in 42,310*  
688 *participants*. *Nat Commun*, 2020. **11**(1): p. 2175.
- 689 50. Knol, M.J., D. Lu, M. Traylor, H.H.H. Adams, J.R.J. Romero, A.V. Smith, et al., *Association of*  
690 *common genetic variants with brain microbleeds: A genome-wide association study*.  
691 *Neurology*, 2020. **95**(24): p. e3331-e3343.
- 692 51. Bellenguez, C., F. Kucukali, I.E. Jansen, L. Kleindam, S. Moreno-Grau, N. Amin, et al., *New*  
693 *insights into the genetic etiology of Alzheimer's disease and related dementias*. *Nat Genet*,  
694 2022. **54**(4): p. 412-436.
- 695 52. Mishra, A., R. Malik, T. Hachiya, T. Jurgenson, S. Namba, D.C. Posner, et al., *Stroke genetics*  
696 *informs drug discovery and risk prediction across ancestries*. *Nature*, 2022. **611**(7934): p.  
697 115-123.
- 698 53. Bakker, M.K., R.A.A. van der Spek, W. van Rheenen, S. Morel, R. Bourcier, I.C. Hostettler, et  
699 al., *Genome-wide association study of intracranial aneurysms identifies 17 risk loci and*  
700 *genetic overlap with clinical risk factors*. *Nat Genet*, 2020. **52**(12): p. 1303-1313.
- 701 54. Hemani, G., J. Zheng, B. Elsworth, K.H. Wade, V. Haberland, D. Baird, et al., *The MR-Base*  
702 *platform supports systematic causal inference across the human phenome*. *Elife*, 2018. **7**.
- 703 55. Zhao, Q., J. Wang, G. Hemani, J. Bowden, and D.S. Small, *Statistical inference in two-sample*  
704 *summary-data Mendelian randomization using robust adjusted profile score*. *The Annals of*  
705 *Statistics*, 2020. **48**(3): p. 1742-1769, 28.

- 706 56. Verbanck, M., C.Y. Chen, B. Neale, and R. Do, *Detection of widespread horizontal pleiotropy*  
707 *in causal relationships inferred from Mendelian randomization between complex traits and*  
708 *diseases*. Nat Genet, 2018. **50**(5): p. 693-698.
- 709 57. Burgess, S., A. Butterworth, and S.G. Thompson, *Mendelian randomization analysis with*  
710 *multiple genetic variants using summarized data*. Genet Epidemiol, 2013. **37**(7): p. 658-65.
- 711 58. Bowden, J., G. Davey Smith, P.C. Haycock, and S. Burgess, *Consistent Estimation in*  
712 *Mendelian Randomization with Some Invalid Instruments Using a Weighted Median*  
713 *Estimator*. Genet Epidemiol, 2016. **40**(4): p. 304-14.
- 714 59. Burgess, S. and S.G. Thompson, *Interpreting findings from Mendelian randomization using*  
715 *the MR-Egger method*. Eur J Epidemiol, 2017. **32**(5): p. 377-389.
- 716 60. Robinson, J.W., G. Hemani, M.S. Babaei, Y. Huang, D.A. Baird, E.A. Tsai, et al., *An efficient*  
717 *and robust tool for colocalisation: Pair-wise Conditional and Colocalisation (PWCoCo)*.  
718 bioRxiv, 2022: p. 2022.08.08.503158.
- 719

720 **Figure legends**

721 **Figure 1.** Overview of the study design. This study involved European (N = 3514), Latin (N = 4309),  
722 and Persian (N = 1332) PURE participants for whom genetic and plasma proteomic data were  
723 available. Observational analyses to detect plasma biomarkers of cognitive function were performed  
724 in the subset of these participants who were enrolled in the PURE-MIND sub-study (N = 1198), for  
725 whom plasma protein (N = 1060 proteins) and MRI measurements were available. Mediation  
726 analyses were performed to assess whether any observed associations between protein levels and  
727 cognitive function were mediated by structural brain phenotypes ascertained by MRI. Finally, two-  
728 sample Mendelian randomisation analyses were performed to assess potentially causal effects of  
729 genetically-predicted cognition-associated protein levels on genetically-predicted neurological  
730 outcomes. For these analyses, genetic instrumental variables for protein levels were identified in the  
731 European, Latin, and Persian PURE participants, and associations with neurological outcomes were  
732 assessed using external (non-PURE) datasets.

733 **Figure 2.** Manhattan plot indicating associations between the levels of plasma proteins and  
734 performance on the DSST in participants from the PURE-MIND cohort (N = 1198). Each protein is  
735 represented by a triangle with upwards-facing triangles indicating a positive association with DSST  
736 performance and downwards-facing triangles indicating a negative association with DSST  
737 performance. The position of each protein on the x-axis is determined by the genomic location of its  
738 corresponding gene and the position on the y-axis is determined by the  $-\log_{10} p$ -value. The dashed  
739 horizontal line indicates the Bonferroni-corrected significance threshold ( $p = 4.31 \times 10^{-5}$ ) required to  
740 maintain a 5% type I error rate.

741 **Figure 3.** Forest plot indicating the association between protein levels and DSST performance for  
742 significantly associated proteins. For each protein, the difference in DSST score associated with a  
743 standard deviation higher level of protein is shown, together with the 95% confidence interval.  
744 Abbreviations: BCAN: brevican; CA14: carbonic anhydrase 14; CDCP1: CUB-domain containing

745 protein 1; CI: confidence interval; GS: Generation Scotland imaging subsample; MOG: myelin  
746 oligodendrocyte glycoprotein; NCAN: neurocan; PURE: Prospective Urban and Rural Epidemiology  
747 study.

748 **Figure 4.** Forest plots indicating the association between the levels of DSST-associated proteins and  
749 DSST-associated structural brain phenotype. For each protein, the effect estimate (change in brain  
750 volume (cm<sup>3</sup> or %) per standard deviation increase in protein expression) is shown, together with the  
751 95% confidence interval. Abbreviations: BCAN: brevican; CA14: carbonic anhydrase 14; CDCP1: CUB-  
752 domain containing protein 1; CI: confidence interval; GS: Generation Scotland imaging subsample;  
753 MOG: myelin oligodendrocyte glycoprotein; NCAN: neurocan; PURE: Prospective Urban and Rural  
754 Epidemiology study; WMH: white matter hyperintensity.

755 **Tables**

756 **Table 1.** Demographic information for the discovery sample (PURE-MIND) and the replication sample (GS). Basic sample demographic information is  
 757 presented together with information on relevant clinical characteristics, cognitive performance, and structural brain imaging measures. The number of  
 758 participants for whom information was available for each variable are indicated in the “N” columns. In GS, there were participants with missing information  
 759 for smoking (N = 31), hypertension (N = 2), diabetes (N = 1), stroke (N = 1), and depression (N = 2). \*PURE-MIND: college or university; GS: university. For  
 760 variables that were measured in both cohorts, a statistical comparison was performed and significant *p*-values (*p* < 0.05) are indicated in bold.

|                                           | PURE-MIND   |             | GS          |             | Test statistic (degrees of freedom) | <i>p</i> -value                    |
|-------------------------------------------|-------------|-------------|-------------|-------------|-------------------------------------|------------------------------------|
|                                           | N (%)       | Mean (SD)   | N (%)       | Mean (SD)   |                                     |                                    |
| <b>Age (years)</b>                        | 1198        | 54.5 (8.05) | 1053        | 59.9 (9.59) | <i>t</i> = 14.5 (df = 2249)         | <b>&lt; 2.2 x 10<sup>-16</sup></b> |
| <b>Sex</b>                                |             |             |             |             |                                     |                                    |
| Female                                    | 709 (59.2%) |             | 627 (59.5%) |             | $\chi^2 = 0.0173$                   | 0.895                              |
| Male                                      | 489 (40.8%) |             | 426 (40.5%) |             |                                     |                                    |
| <b>Education (highest level achieved)</b> |             |             |             |             |                                     |                                    |
| High school or less                       | 346 (28.9%) |             | 316 (29.9%) |             | Fisher's exact test                 | <b>5.0 x 10<sup>-4</sup></b>       |
| Trade school                              | 83 (6.93%)  |             | 328 (31.1%) |             |                                     |                                    |
| College/university*                       | 768 (64.1%) |             | 295 (28.0%) |             |                                     |                                    |

|                                               |             |                   |             |             |                          |                                              |
|-----------------------------------------------|-------------|-------------------|-------------|-------------|--------------------------|----------------------------------------------|
| Other                                         | NA          |                   | 21 (1.99%)  |             |                          |                                              |
| Unknown                                       | 1 (0.0835%) |                   | 94 (8.93%)  |             |                          |                                              |
| <b>Clinical characteristics</b>               |             |                   |             |             |                          |                                              |
| Current/former smoker                         | 583 (48.7%) |                   | 466 (45.6%) |             | $\chi^2 = 1.96$          | 0.161                                        |
| Non-smoker                                    | 615 (51.3%) |                   | 556 (54.4%) |             |                          |                                              |
| Body mass index (kg/m <sup>2</sup> )          | 1193        | 27.1 (5.15)       | 1053        | 28.2 (5.72) | $t = 5.06$ (df = 2244)   | <b><math>4.92 \times 10^{-7}</math></b>      |
| Waist hip ratio                               | 1192        | 0.870<br>(0.0965) |             |             | N/A                      |                                              |
| Systolic blood pressure                       | 1197        | 130 (18.8)        | 1051        | 141 (18.9)  | $t = -13.8$ (df = 2246)  | <b><math>&lt; 2.2 \times 10^{-16}</math></b> |
| Diastolic blood pressure                      | 1197        | 80.9 (11.3)       | 1051        | 82.4 (10.8) | $t = -3.21$ (df = 2246)  | <b><math>1.37 \times 10^{-3}</math></b>      |
| Hypertension                                  | 270 (22.5%) |                   |             |             | N/A                      |                                              |
| Total cholesterol (mmol/L)                    | 1197        | 5.52 (1.11)       |             |             | N/A                      |                                              |
| High density lipoprotein cholesterol (mmol/L) | 1197        | 1.47 (0.399)      |             |             | N/A                      |                                              |
| Low density lipoprotein cholesterol (mmol/L)  | 1187        | 3.35 (0.882)      |             |             | N/A                      |                                              |
| Diabetes                                      | 61 (5.09%)  |                   | 73 (6.93%)  |             | $\chi^2 = 3.09$ (df = 1) | 0.0787                                       |
| Stroke                                        | 3 (0.250%)  |                   | 27 (2.56%)  |             | Fisher's exact test      | <b><math>8.53 \times 10^{-7}</math></b>      |
| Cardiovascular disease                        | 36 (3.00%)  |                   | 103 (9.78%) |             | $\chi^2 = 43.3$ (df = 1) | <b><math>4.80 \times 10^{-11}</math></b>     |

|                                                             |            |               |             |               |                          |                                              |
|-------------------------------------------------------------|------------|---------------|-------------|---------------|--------------------------|----------------------------------------------|
| Depression                                                  | NA         |               | 336 (31.9%) |               | N/A                      |                                              |
| <b>Cognitive tests</b>                                      |            |               |             |               |                          |                                              |
| Digit Symbol Substitution Test (no. correct in two minutes) | 1198       | 69.5 (15.3)   | 1053        | 68.1 (15.2)   | $t = -2.18$ (df = 2249)  | <b>0.0298</b>                                |
| Montreal Cognitive Assessment (no. items correct)           | 1198       | 26.5 (2.39)   |             |               | N/A                      |                                              |
| <b>Brain Imaging Measures</b>                               |            |               |             |               |                          |                                              |
| Cortical thickness (mm)                                     | 1198       | 2.35 (0.0891) |             |               | N/A                      |                                              |
| Total brain volume without ventricles (cm <sup>3</sup> )    | 1198       | 1058 (110)    | 943         | 1069 (109)    | $t = -2.31$ (df = 2139)  | <b>0.0212</b>                                |
| Total cerebral white matter volume (cm <sup>3</sup> )       | 1198       | 447 (60.5)    | 939         | 455 (56.9)    | $t = -3.11$ (df = 2135)  | <b><math>1.87 \times 10^{-3}</math></b>      |
| Total hippocampal volume (cm <sup>3</sup> )                 | 1198       | 3.92 (0.433)  | 941         | 4.18 (0.437)  | $t = -13.7$ (df = 2137)  | <b><math>&lt; 2.2 \times 10^{-16}</math></b> |
| WMH volume (log-transformed cm <sup>3</sup> )               | 1198       | 0.751 (0.693) | 934         | 0.777 (0.789) | $t = -0.807$ (df = 2130) | 0.419                                        |
| Estimated intracranial volume (cm <sup>3</sup> )            | 1198       | 1491 (159)    | 944         | 1400 (225)    | $t = 11.0$ (df = 2140)   | <b><math>&lt; 2.2 \times 10^{-16}</math></b> |
| Silent brain infarct                                        | 95 (7.93%) |               |             |               | N/A                      |                                              |
| Cerebral microbleeds                                        | 86 (7.18%) |               |             |               | N/A                      |                                              |

762 Abbreviations: GS: Generation Scotland; PURE: Prospective Urban and Rural Epidemiology study; SD: standard deviation; WMH: white matter  
763 hyperintensities





1 Study cohort

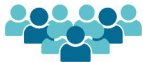

PURE participants with:

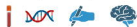

2 Observational association analyses

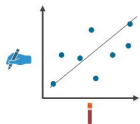

- A Identify cognition-associated proteins
- B Replication analyses in independent STRADL cohort

3 Mediation analyses

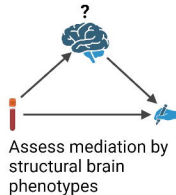

4 Mendelian randomisation

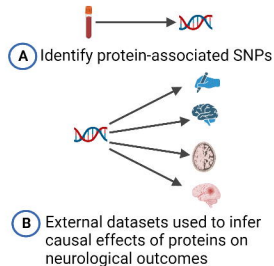

KEY

|                     |  |                            |  |
|---------------------|--|----------------------------|--|
| Alzheimer's disease |  | MRI brain imaging          |  |
| Cognitive tests     |  | Plasma proteomics (x 1060) |  |
| Genotyping          |  | Stroke                     |  |

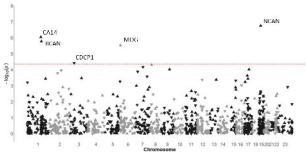

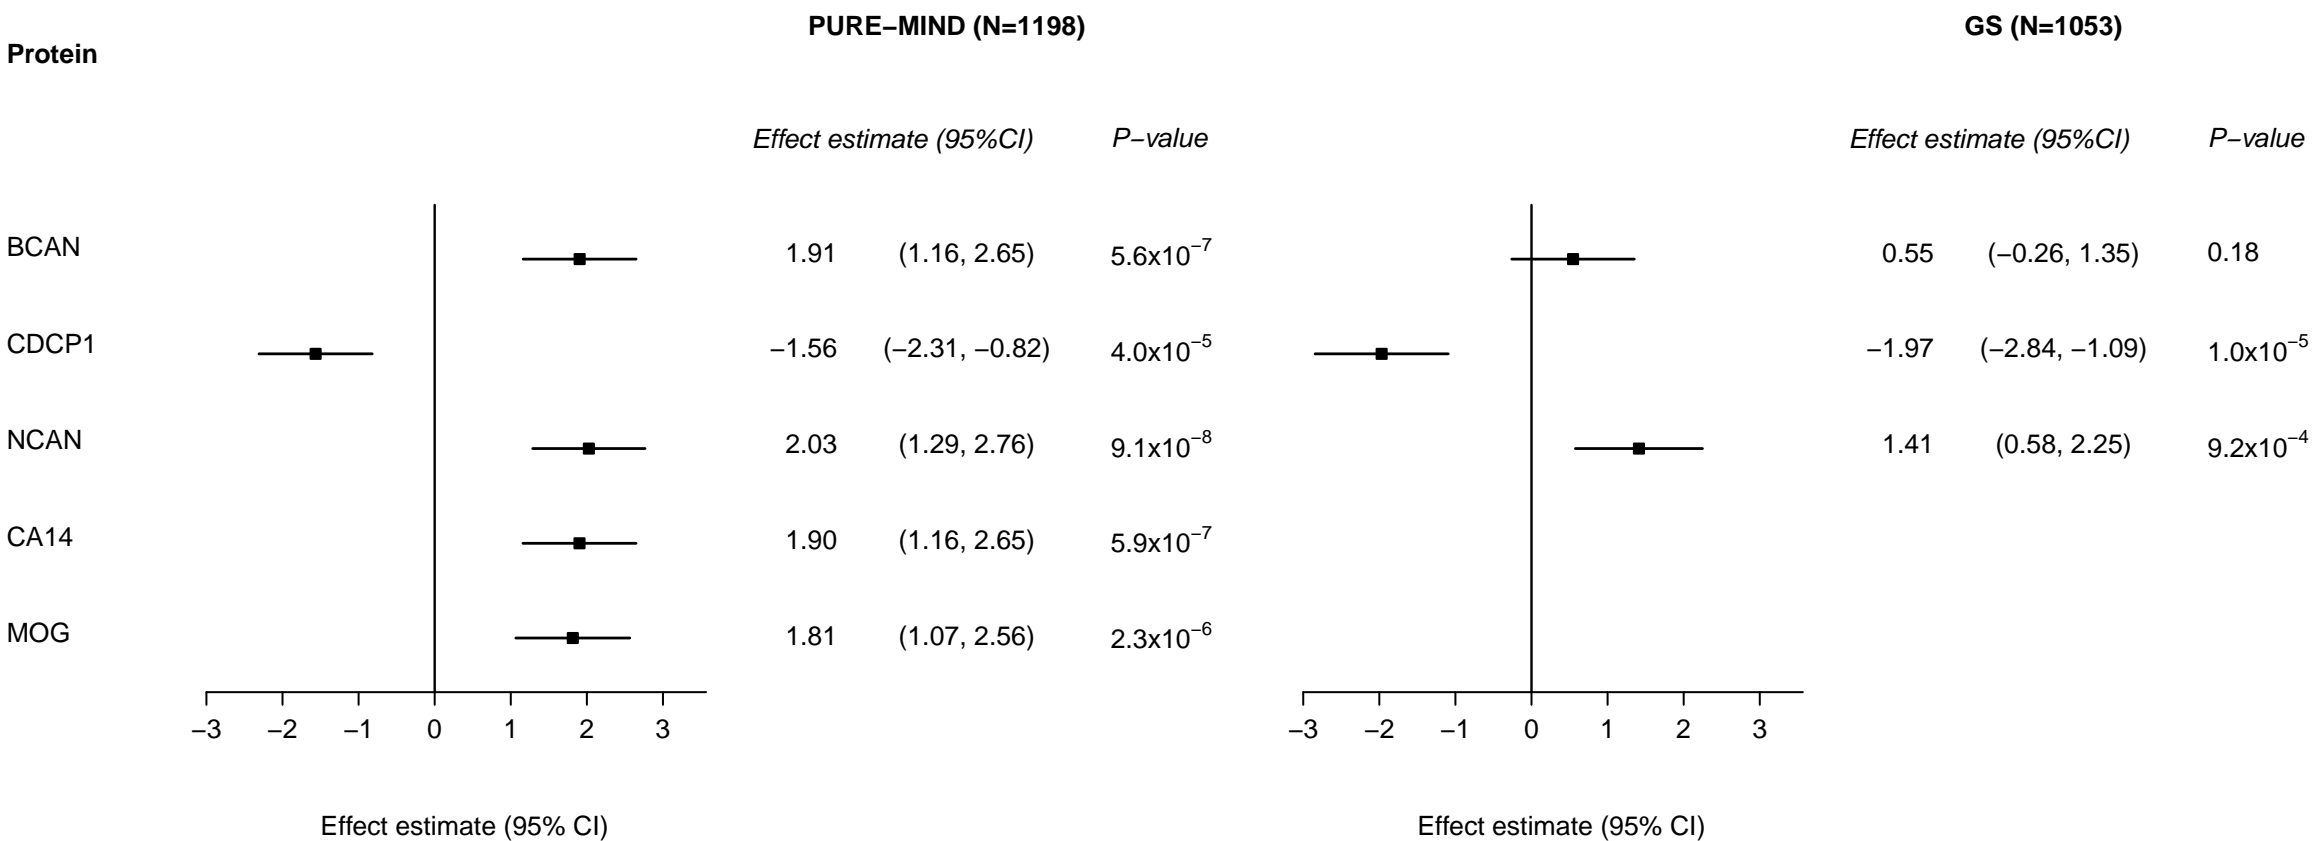

**Phenotype**

**PURE-MIND (N = 1168–1198)**

**GS (N = 932–939)**

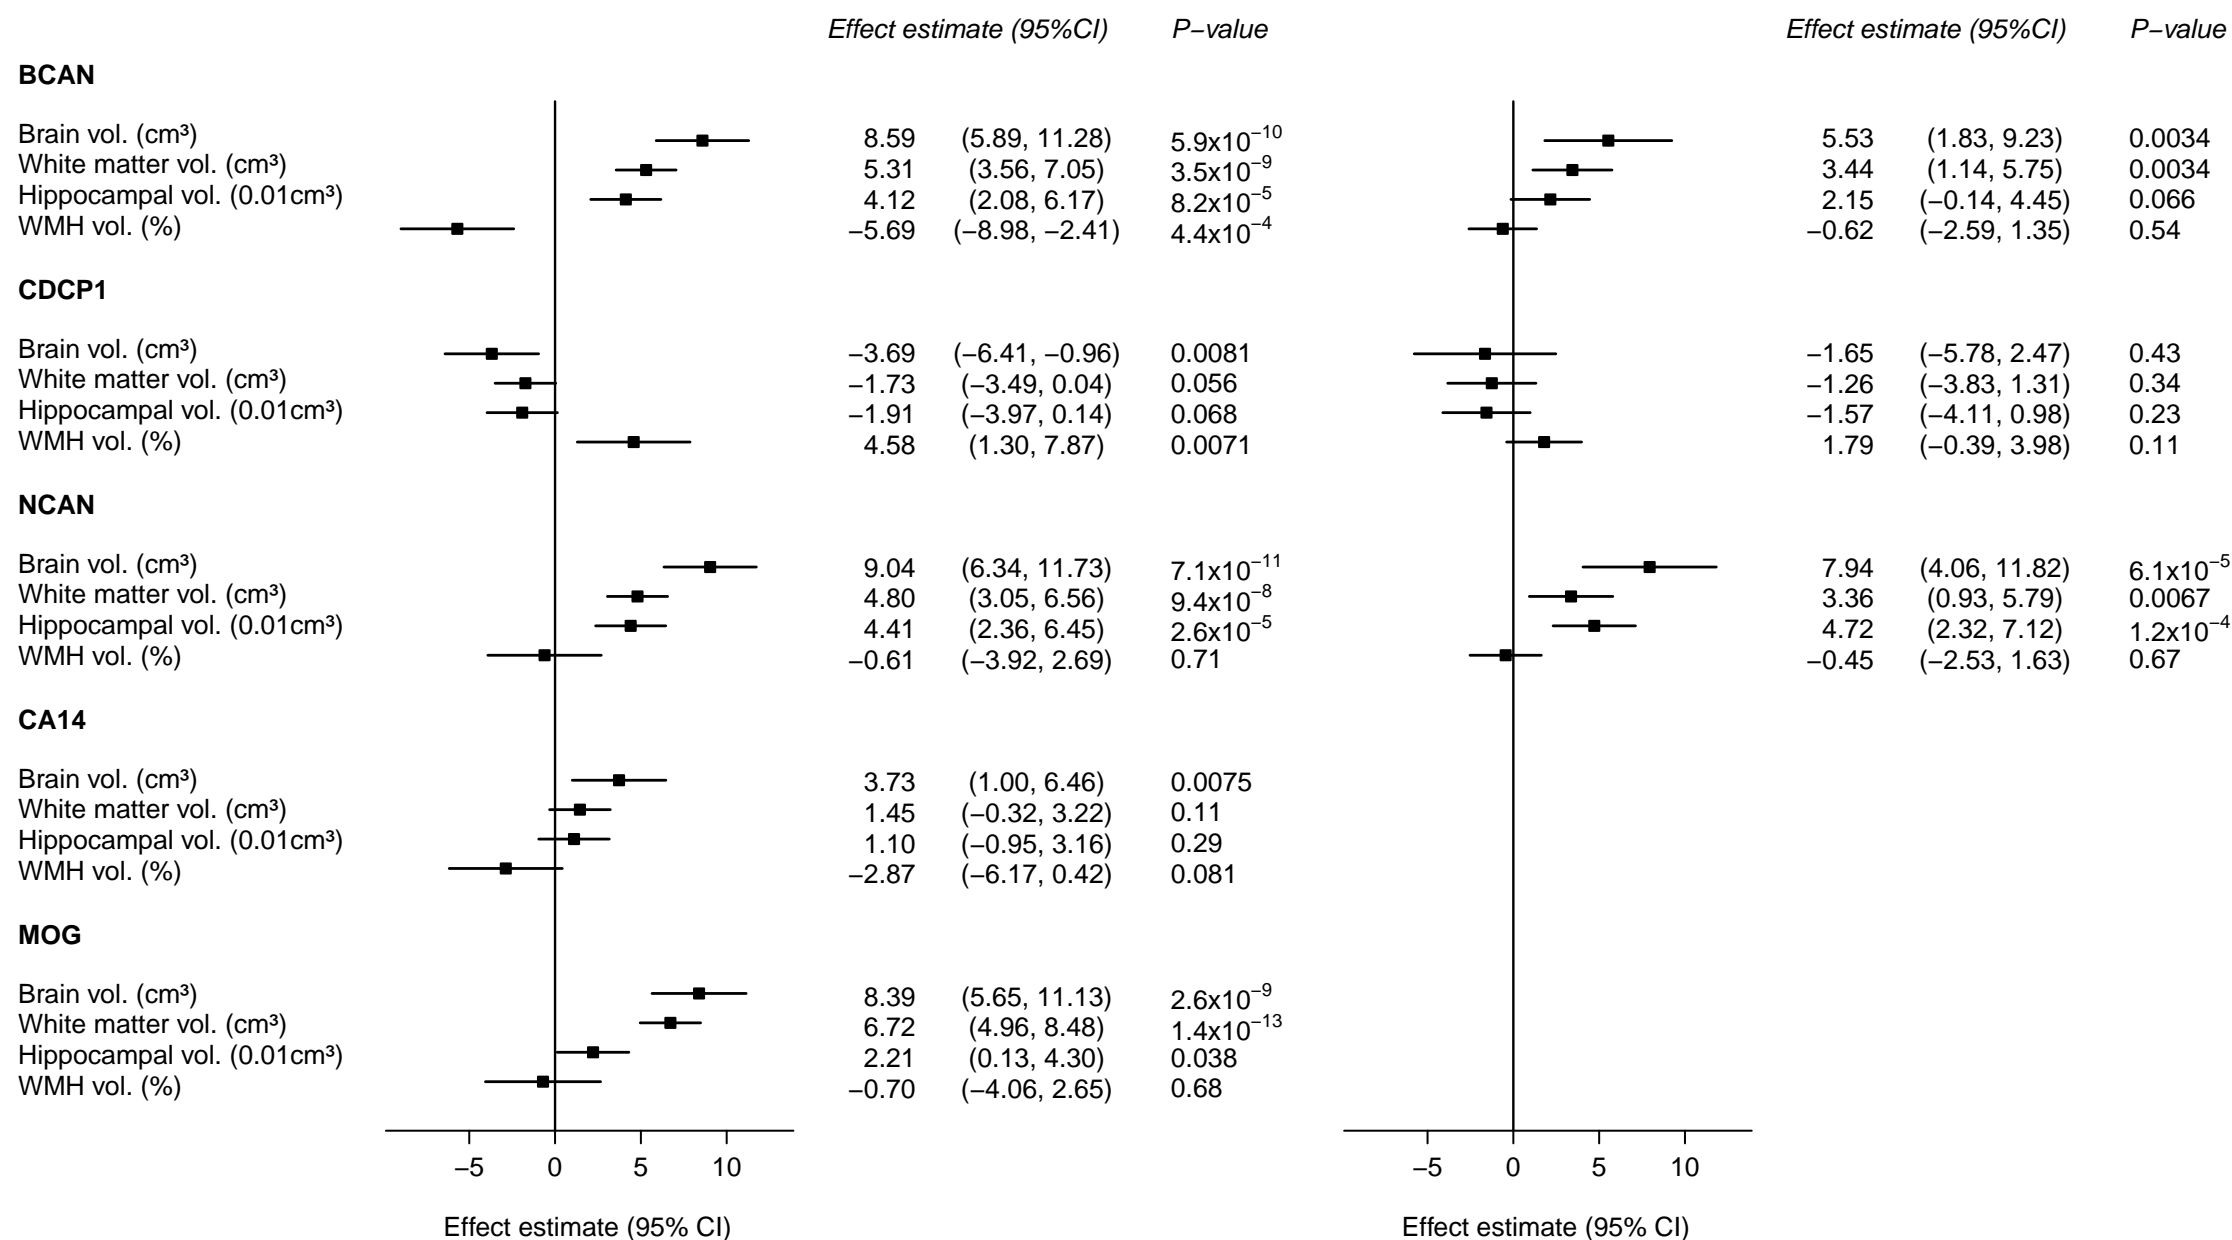

Source: https://medrxiv.org/content/10.1101/2023.07.27.23293236.full.pdf
